# Supplementary material for: Association between bronchopulmonary dysplasia and cerebral palsy in children: a meta-analysis
Source: PubMed Central journal article supplement — BMJ Open. 2018 Sep 19;8(9):e020735. doi: 10.1136/bmjopen-2017-020735 (PMC6150141; doi:10.1136/bmjopen-2017-020735), 2018-09-19
Supplement: bmjopen-2017-020735supp001.pdf [file bmjopen-2017-020735supp001.pdf]

## **The association between bronchopulmonary dysplasia and cerebral palsy in children: A meta-analysis**

### **Supplement 1. Retrieval strategy of PubMed, EMBASE and Web of Science**

Before 1 September 2017.

#### **PubMed 195**

Search (((((((Cerebral pals\*[Title/Abstract]) OR CP[Title/Abstract]) OR spastic\*[Title/Abstract]) OR Cerebral Palsy[Title/Abstract])) OR "Cerebral Palsy"[Mesh])) AND (((((((Dysplasia, Bronchopulmonary[Title/Abstract]) OR Bronchopulmonary Dysplasia[Title/Abstract]) OR BPD[Title/Abstract]) OR bronchopulmonary dysplasia[Title/Abstract])) OR "Bronchopulmonary Dysplasia"[Mesh])

#### **EMBASE 523**

Before 1 September 2017.

1 Cerebral palsy/

2 Cerebral pals\$.tw.

3 Little\$ disease.tw.

4 CP.tw.

5 (unilateral adj3 spastic\$.tw.

6 (hemiplegi\$ adj3 spastic\$.tw.

7 (diplegi\$ adj3 spastic\$.tw.

8 (tetrapleg\$ adj3 spastic\$.tw.

9 (triplegi\$ adj3 spastic\$.tw.

10 ((bilateral or bi-lateral) adj3 spastic\$.tw.

11 (quadripleg\$ adj3 spastic\$.tw.

12 or/1-11

13 Bronchopulmonary Dysplasia.mp. or exp lung dysplasia/

14 BPD.tw.

15 Dysplasia, Bronchopulmonary.tw.

16 Bronchopulmonary Dysplasia.tw.

17 13 or 14 or 15 or 16

18 12 and 17

**Web of science 515**

Before 1 September 2017.

TS=(cerebral pals\* or spastic\* or quadripleg\* or cerebral palsy or CP)

TS=(Bronchopulmonary Dysplasia or lung dysplasia or bronchopulmonary dysplasia or BPD or Dysplasia, Bronchopulmonary)

**Supplement 2. Newcastle - Ottawa Quality Assessment Scale results for case-control studies**

| Question                                                                   | Option                                                                                                                                                                                                   | Kim | Schlapbach | Tran |
|----------------------------------------------------------------------------|----------------------------------------------------------------------------------------------------------------------------------------------------------------------------------------------------------|-----|------------|------|
| Is the case definition adequate?                                           | a) yes, with independent validation *<br>b) yes, eg record linkage or based on self reports<br>c) no description                                                                                         | a   | a          | a    |
| Representativeness of the cases                                            | a) consecutive or obviously representative series of cases *<br>b) potential for selection biases or not stated                                                                                          | a   | b          | b    |
| Selection of Controls                                                      | a) community controls *<br>b) hospital controls<br>c) no description                                                                                                                                     | b   | b          | b    |
| Definition of Controls                                                     | a) no history of disease (endpoint)*<br>b) no description of source                                                                                                                                      | a   | a          | b    |
| Comparability of cases and controls on the basis of the design or analysis | a) study controls for (Select the most important factor.*<br>b) study controls for any additional factor (This criteria could be modified to indicate specific control for a second important factor.) * | a   | a          | a    |

|                                                     |                                                                                                                                                                                                                                 |   |   |   |
|-----------------------------------------------------|---------------------------------------------------------------------------------------------------------------------------------------------------------------------------------------------------------------------------------|---|---|---|
| Ascertainment of exposure                           | a) secure record (eg surgical records)*<br>b) structured interview where blind to case/control status*<br>c) interview not blinded to case/control status<br>d) written self report or medical record only<br>e) no description | a | a | a |
| Same method of ascertainment for cases and controls | a) yes*<br>b) no                                                                                                                                                                                                                | a | a | a |
| Non-Response rate                                   | a) same rate for both groups*<br>b) non-respondents described<br>c) rate different and no designation                                                                                                                           | b | a | b |



|                                                    |                                                                                                                                                                                                                                                                                                                                                                                                  |   |   |   |   |   |   |   |   |
|----------------------------------------------------|--------------------------------------------------------------------------------------------------------------------------------------------------------------------------------------------------------------------------------------------------------------------------------------------------------------------------------------------------------------------------------------------------|---|---|---|---|---|---|---|---|
| Assessment of outcome                              | <ul style="list-style-type: none"> <li>a) independent blind assessment*</li> <li>b) record linkage*</li> <li>c) self report</li> <li>d) no description</li> </ul>                                                                                                                                                                                                                                | b | b | b | b | b | b | b | b |
| Was follow-up long enough<br>for outcomes to occur | <ul style="list-style-type: none"> <li>a) yes*</li> <li>b) no</li> </ul>                                                                                                                                                                                                                                                                                                                         | b | b | b | a | a | a | a | a |
| Adequacy of follow up<br>of cohort                 | <ul style="list-style-type: none"> <li>a) complete follow up - all subjects accounted for*</li> <li>b) subjects lost to follow up unlikely to introduce bias - small number lost - &gt; % (select an adequate %) follow up, or description provided of those lost)</li> <li>c) follow up rate &lt; % (select an adequate %) and no description of those lost</li> <li>d) no statement</li> </ul> | d | d | d | d | d | d | d | d |

#### Supplement 4. Egger's and Begg's test for publication bias test

##### Begg's Test

adj. Kendall's Score (P-Q) = 6

Std. Dev. of Score = 9.59

Number of Studies = 9

$z = 0.63$

Pr > |z| = 0.532

$z = 0.52$  (continuity corrected)

Pr > |z| = 0.602 (continuity corrected)

##### Egger's test

---

|       | Std_Eff   | Coef.   | Std. Err. | t     | P> t | [95% Conf. Interval] |          |
|-------|-----------|---------|-----------|-------|------|----------------------|----------|
|       |           |         |           |       |      |                      |          |
| slope | .1683662  | .139195 | 1.21      | 0.266 |      | -.1607777            | .49751   |
| bias  | -.8435039 | .608102 | -1.39     | 0.208 |      | -2.281437            | .5944288 |

---
